# Supplementary material for: Study on the chemical synthesis process of Ga2O3 nanowires and their ultraviolet light sensor properties
Source: Royal Society of Chemistry journal article supplement (doi:10.1039/d2ce01060g), 2022-01-01
Supplement: d2ce01060g1.pdf [file d2ce01060g1.pdf]

## Supporting Information

### Study on Chemical synthesis process of Ga<sub>2</sub>O<sub>3</sub> nanowires and their ultraviolet light sensor properties

Kohki Mukai and Keishiro Hirota

Graduate School of Engineering Science, Yokohama National University  
79-5 Tokiwadai, Hodogaya-ku, Yokohama 240-8501, Japan  
Phone: +81-45-339-3853, E-mail: mukai-kohki-cv@ynu.ac.jp

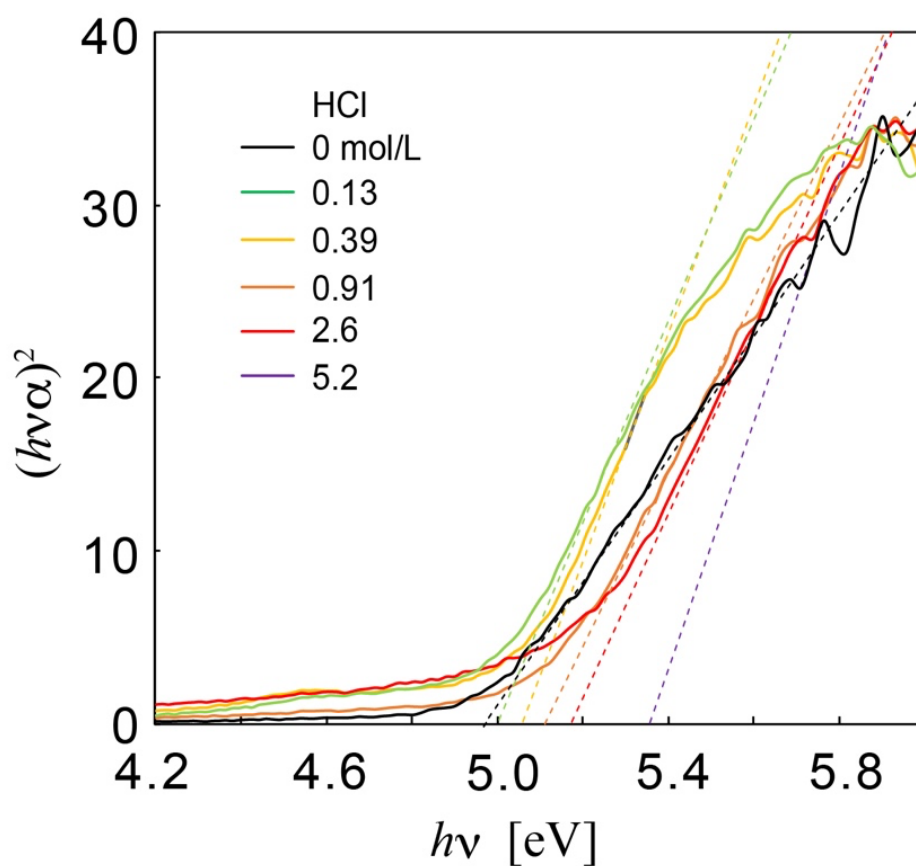

Fig. S1 Tauc plots of Ga<sub>2</sub>O<sub>3</sub> nanowires synthesized with various HCl concentration.

Table SI Crystal lattice spacing and corresponding crystal plane index found from SAED measurements of nanowires grown without HCl.

| heat treatment temperature (°C) | lattice spacing (Å) | crystal type | plane index |
|---------------------------------|---------------------|--------------|-------------|
| 200                             | 2.50                | $\epsilon$   | (100)       |
|                                 | 1.50                |              | (105)       |
| 400                             | 2.50                | $\epsilon$   | (100)       |
|                                 | 1.48                |              | (105)       |
| 700                             | 2.84                | $\beta$      | (002)       |
|                                 | 2.55                |              | (111)       |
|                                 | 2.09                |              | (-112)      |
|                                 | 1.51                |              | (020)       |
|                                 | 1.44                |              | (403)       |
| 900                             | 2.80                | $\beta$      | (002)       |
|                                 | 2.57                |              | (111)       |
|                                 | 2.29                |              | (-311)      |
|                                 | 2.09                |              | (-112)      |
|                                 | 1.95                |              | (112)       |
|                                 | 1.52                |              | (020)       |
|                                 | 1.44                |              | (403)       |

Table SII Crystal lattice spacing and corresponding crystal plane index found from SAED measurements of nanowires grown with 0.39 mol/L HCl.

| heat treatment temperature (°C) | lattice spacing (Å) | crystal type | plane index |
|---------------------------------|---------------------|--------------|-------------|
| 200                             | 2.52                | $\epsilon$   | (100)       |
|                                 | 1.49                |              | (105)       |
| 400                             | 2.51                | $\epsilon$   | (100)       |
|                                 | 1.49                |              | (105)       |
| 700                             | 2.81                | $\beta$      | (002)       |
|                                 | 2.59                |              | (111)       |
|                                 | 2.09                |              | (-112)      |
|                                 | 1.51                |              | (020)       |
|                                 | 1.43                |              | (403)       |
| 900                             | 2.80                | $\beta$      | (002)       |
|                                 | 2.56                |              | (111)       |
|                                 | 2.31                |              | (-311)      |
|                                 | 2.10                |              | (-112)      |
|                                 | 1.97                |              | (112)       |
|                                 | 1.51                |              | (020)       |
|                                 | 1.44                |              | (403)       |
